# Supplementary material
Source: PubMed Central journal article supplement (PMC9018563)
Supplement: NIHMS1784277-supplement-1.pdf [file NIHMS1784277-supplement-1.pdf]

**Table S1: FTLD TDP, PSP, and DLB cases used for cryo-EM and mass spectrometry, Related to Figure 2.** ALS, amyotrophic lateral sclerosis; bvFTD, behavioral variant frontotemporal dementia; C9orf72 rpt exp, chromosome 9 open reading frame gene repeat expansion; FH, family history of neurodegenerative disease; FTLD-TDP, frontotemporal lobar degeneration with TDP-43 pathology; PSP, progressive supranuclear palsy; DLB, dementia with Lewy bodies; GRN, granulin gene; PPA, primary progressive aphasia; nvfPPA, non-fluent variant PPA; svPPA, semantic variant PPA; park, parkinsonism; parkplus, Parkinson plus syndrome; PSA, progressive speech apraxia; oph, ophthalmoplegia; SGP, supranuclear gaze palsy; psych, psychiatric symptoms; dysph, dysphagia; akinr, akinetic rigidity.

| Case | sex | onset/<br>death | symptoms                    | FH  | mutation                                        | TMEM<br>rs3173615 | pathology     |
|------|-----|-----------------|-----------------------------|-----|-------------------------------------------------|-------------------|---------------|
| 1    | M   | 55/60           | bvFTD, park                 | yes | <i>GRN</i> c.1072C>T                            | CC (Thr/Thr)      | FTLD-TDP<br>A |
| 2    | F   | 48/55           | nvfPPA, bvFTD               | ?   | <i>GRN</i> c.1180-<br>1G>A                      | CG<br>(Thr/Ser)   | FTLD-TDP<br>A |
| 3    | F   | 53/60           | PPA, bvFTD,<br>psych        | yes | <i>GRN</i> c.102delC                            | CC (Thr/Thr)      | FTLD-TDP<br>A |
| 4    | M   | 79/89           | nvfPPA                      | no  | no                                              | CG<br>(Thr/Ser)   | FTLD-TDP<br>A |
| 5    | F   | 44/48           | nvfPPA                      | yes | <i>GRN</i> c.87_90dup<br><i>C9orf72</i> rpt exp | CC<br>(Thr/Thr)   | FTLD-TDP<br>A |
| 6    | M   | 58/62           | bvFTD, ALS                  | no  | no                                              | CG<br>(Thr/Ser)   | FTLD-TDP<br>B |
| 7    | F   | 72/74           | ALS, mild<br>dementia       | no  | no                                              | GG<br>(Ser/Ser)   | FTLD-TDP<br>B |
| 8    | M   | 55/69           | svPPA                       | no  | no                                              | CC (Thr/Thr)      | FTLD-TDP<br>C |
| 9    | F   | 53/60           | bvFTD                       | yes | <i>GRN</i> c.87_90dup                           | CG<br>(Thr/Ser)   | FTLD-TDP<br>A |
| 1    | M   | 62/68           | parkplus                    | ?   | N/A                                             | N/A               | PSP           |
| 2    | M   | 65/75           | PSA, ophth                  | no  | N/A                                             | CG<br>(Thr/Ser)   | PSP           |
| 3    | F   | 51/59           | SGP, psych,<br>dysph, akinr | no  | N/A                                             | CC (Thr/Thr)      | PSP           |
| 1    | M   | 58/68           | park, psych                 | no  | N/A                                             | N/A               | DLB           |

**Table S2. Cryo-EM data collection, refinement and validation statistics for FTLD-TDP cases, Related to Figures 2-5 and STAR Methods. S, singlet fibril; D, doublet fibril; P, protofilament.**

|                                           | Combined Map |       | Type A Case 1 (GRN) |       |       | Type A Case 2 (GRN) |       | Type A Case 3 (GRN) |       | Type A Case 4 (sporadic) |       | Type A Case 5 | Type B Case 1 |       | Type B Case 2 high-twist |       | Type C     |  |
|-------------------------------------------|--------------|-------|---------------------|-------|-------|---------------------|-------|---------------------|-------|--------------------------|-------|---------------|---------------|-------|--------------------------|-------|------------|--|
| <b>Data collection and processing</b>     |              |       |                     |       |       |                     |       |                     |       |                          |       |               |               |       |                          |       |            |  |
| Electron Gun                              |              |       | x-FEG               |       |       | x-FEG               |       | x-FEG               |       | x-FEG                    |       | x-FEG         | x-FEG         |       | x-FEG                    |       | x-FEG      |  |
| Detector                                  |              |       | K3                  |       |       | K3                  |       | K3                  |       | K3                       |       | K3            | K3            |       | K3                       |       | K3         |  |
| Magnification                             |              |       | ×81,000             |       |       | ×81,000             |       | ×81,000             |       | ×81,000                  |       | ×81,000       | ×81,000       |       | ×81,000                  |       | ×81,000    |  |
| Voltage (kV)                              |              |       | 300                 |       |       | 300                 |       | 300                 |       | 300                      |       | 300           | 300           |       | 300                      |       | 300        |  |
| Electron exposure (e/Å <sup>2</sup> )     |              |       | 60                  |       |       | 60                  |       | 60                  |       | 60                       |       | 60            | 60            |       | 60                       |       | 60         |  |
| Defocus range (µm)                        |              |       | 1.4 to 2.8          |       |       | 1.4 to 2.8          |       | 1.4 to 2.8          |       | 1.4 to 2.8               |       | 1.4 to 2.8    | 1.4 to 2.8    |       | 1.4 to 2.8               |       | 1.4 to 2.8 |  |
| Pixel Size (Å)                            |              |       | 1.07                |       |       | 1.07                |       | 1.07                |       | 1.07                     |       | 1.07          | 1.07          |       | 1.05                     |       | 1.07       |  |
|                                           | S            | P     | S                   | D     | P     | S                   | D     | S                   | D     | S                        | D     | D             | S             | S     | S                        | S     | D          |  |
| Symmetry imposed                          | C1           | C1    | C1                  | C2    | C1    | C1                  | C2    | C1                  | C2    | C1                       | C2    | C2            | C1            | C1    | C1                       | C1    | C2         |  |
| Final particle images (no.)               | 255K         | 55K   | 112K                | 56K   | 58K   | 45K                 | 21K   | 26K                 | 26K   | 143K                     | 147K  | 17K           | 11K           | 31K   | 158K                     | 13K   |            |  |
| Map resolution (Å; FSC=0.143)             | 3.0          | 2.7   | 3.4                 | 3.1   | 3.2   | 3.5                 | 4.3   | 4.5                 | 7.0   | 2.9                      | 2.8   | 6.9           | 7.2           | 3.0   | 4.5                      | 4.4   |            |  |
| Helical rise (Å)                          | 4.8          | 4.8   | 4.8                 | 4.8   | 4.8   | 4.8                 | 4.8   | 4.8                 | 4.8   | 4.8                      | 4.8   | 4.8           | 4.8           | 4.8   | 4.8                      | 4.8   |            |  |
| Helical twist (°)                         | -0.4         | -0.4  | -0.4                | -0.4  | -0.4  | -0.4                | -0.4  | -0.4                | -0.4  | -0.4                     | -0.4  | -0.4          | -0.4          | -0.67 | -0.4                     | -0.4  |            |  |
| <b>Refinement</b>                         |              |       |                     |       |       |                     |       |                     |       |                          |       |               |               |       |                          |       |            |  |
| Model-to-map fit CC                       | 0.77         |       | 0.64                |       |       | 0.46                |       | N.R.                |       | 0.50                     |       | N.R.          | N.R.          |       | 0.74                     |       | 0.52       |  |
| Map sharpening B factor (Å <sup>2</sup> ) | -50          |       | -61                 |       |       | -50                 |       | N.R.                |       | -50                      |       | N.R.          | N.R.          |       | -91                      |       | -97        |  |
| Model composition                         |              |       |                     |       |       |                     |       |                     |       |                          |       |               |               |       |                          |       |            |  |
| Non-hydrogen atoms                        | 3,429        |       | 3,429               |       |       | 3,429               |       | N.R.                |       | 3,429                    |       | N.R.          | N.R.          |       | 3,429                    |       | 3,429      |  |
| Protein residues                          | 405          |       | 405                 |       |       | 405                 |       | N.R.                |       | 405                      |       | N.R.          | N.R.          |       | 405                      |       | 405        |  |
| B factors (Å <sup>2</sup> )               |              |       |                     |       |       |                     |       |                     |       |                          |       |               |               |       |                          |       |            |  |
| Protein                                   | 80           |       | 70                  |       |       | 40                  |       | N.R.                |       | 76                       |       | N.R.          | N.R.          |       | 74                       |       | 75         |  |
| R.M.S.D.                                  |              |       |                     |       |       |                     |       |                     |       |                          |       |               |               |       |                          |       |            |  |
| Bond lengths (Å)                          | 0.003        |       | 0.004               |       |       | 0.010               |       | N.R.                |       | 0.017                    |       | N.R.          | N.R.          |       | 0.005                    |       | 0.005      |  |
| Bond angles (°)                           | 0.544        |       | 0.644               |       |       | 0.992               |       | N.R.                |       | 2.399                    |       | N.R.          | N.R.          |       | 1.183                    |       | 0.869      |  |
| <b>Validation</b>                         |              |       |                     |       |       |                     |       |                     |       |                          |       |               |               |       |                          |       |            |  |
| Clashscore                                | 8.58         |       | 14.68               |       |       | 19.62               |       | N.R.                |       | 28.78                    |       | N.R.          | N.R.          |       | 11.88                    |       | 20.06      |  |
| Poor rotamers (%)                         | 0.00         |       | 2.36                |       |       | 5.51                |       | N.R.                |       | 6.30                     |       | N.R.          | N.R.          |       | 3.17                     |       | 6.30       |  |
| Cβ deviations (%)                         | 0.00         |       | 0.00                |       |       | 0.00                |       | N.R.                |       | 0.00                     |       | N.R.          | N.R.          |       | 0.00                     |       | 0.00       |  |
| <b>Ramachandran plot</b>                  |              |       |                     |       |       |                     |       |                     |       |                          |       |               |               |       |                          |       |            |  |
| Favored (%)                               | 93.23        |       | 93.98               |       |       | 92.23               |       | N.R.                |       | 87.97                    |       | N.R.          | N.R.          |       | 96.24                    |       | 89.47      |  |
| Allowed (%)                               | 6.77         |       | 6.02                |       |       | 7.77                |       | N.R.                |       | 11.28                    |       | N.R.          | N.R.          |       | 3.76                     |       | 10.53      |  |
| Disallowed (%)                            | 0.00         |       | 0.00                |       |       | 0.00                |       | N.R.                |       | 0.75                     |       | N.R.          | N.R.          |       | 0.00                     |       | 0.00       |  |
| PDB                                       | 7U16         |       | 7U11                |       |       | 7U12                |       | 7U13                |       | 7U13                     |       | 7U13          | 7U15          |       | 7U14                     |       |            |  |
| EMDB                                      | 26296        | 26279 | 26295               | 26294 | 26274 | 26275               | 26293 | 26292               | 26291 | 26276                    | 26290 | 26289         | 26288         | 26278 | 26277                    | 26287 |            |  |

**Table S3. Cryo-EM data collection, refinement and validation statistics for PSP and DLB cases, Related to Figure 2 and STAR Methods. S, singlet fibril; D, doublet fibril; P, protofilament.**

|                                                  | PSP-TMEM<br>Case 2 |       |       | PSP-TMEM<br>Case 1 | PSP-TAU<br>Case 1 | PSP-TAU<br>Case 3 | DLB     |       |
|--------------------------------------------------|--------------------|-------|-------|--------------------|-------------------|-------------------|---------|-------|
| <b>Data collection and processing</b>            |                    |       |       |                    |                   |                   |         |       |
| Electron Gun                                     | x-FEG              |       |       | x-FEG              | x-FEG             | x-FEG             | x-FEG   |       |
| Detector                                         | K3                 |       |       | K3                 | K3                | K3                | K3      |       |
| Magnification                                    | ×81,000            |       |       | ×81,000            | ×81,000           | ×81,000           | ×81,000 |       |
| Voltage (kV)                                     | 300                |       |       | 300                | 300               | 300               | 300     |       |
| Electron exposure (e/Å <sup>2</sup> )            | 60                 |       |       | 60                 | 60                | 60                | 60      |       |
| Defocus range (μm)                               | 1.4-2.8            |       |       | 1.0-3.0            | 1.0-3.0           | 1.4-2.8           | 1.4-2.8 |       |
| Pixel Size (Å)                                   | 1.07               |       |       | 1.06               | 1.15              | 3.22              | 1.07    |       |
|                                                  | S                  | D     | P     | S                  | S                 | S                 | S       | D     |
| Symmetry imposed                                 | C1                 | C2    | C1    | C1                 | C1                | C1                | C1      | C2    |
| Final particle images (no.)                      | 95K                | 85K   | 171K  | 32K                | 38K               | 3.9K              | 8.4K    | 6.3K  |
| Map resolution (Å; FSC=0.143)                    | 3.6                | 3.6   | 3.0   | 4.4                | 4.2               | 23                | 7.6     | 8.8   |
| Helical rise (Å)                                 | 4.8                | 4.8   | 4.8   | 4.76               | 4.78              | 4.78              | 4.8     | 4.8   |
| Helical twist (°)                                | -0.4               | -0.4  | -0.4  | -0.39              | -0.86             | -0.86             | -0.4    | -0.4  |
| <b>Refinement</b>                                |                    |       |       |                    |                   |                   |         |       |
| Model-to-map fit CC                              | 0.59               |       |       | N.R.               | 0.69              | N.R.              | N.R.    |       |
| Map sharpening <i>B</i> factor (Å <sup>2</sup> ) | -50                |       |       | N.R.               | -155              | N.R.              | N.R.    |       |
| Model composition                                |                    |       |       |                    |                   |                   |         |       |
| Non-hydrogen atoms                               | 3,429              |       |       | N.R.               | 2487              | N.R.              | N.R.    |       |
| Protein residues                                 | 405                |       |       |                    | 330               |                   |         |       |
| <i>B</i> factors (Å <sup>2</sup> )               |                    |       |       |                    |                   |                   |         |       |
| Protein                                          | 51                 |       |       | N.R.               | 43                | N.R.              | N.R.    |       |
| R.m.s. deviations                                |                    |       |       |                    |                   |                   |         |       |
| Bond lengths (Å)                                 | 0.003              |       |       | N.R.               | 0.004             | N.R.              | N.R.    |       |
| Bond angles (°)                                  | 0.552              |       |       | N.R.               | 0.696             | N.R.              | N.R.    |       |
| Validation                                       |                    |       |       |                    |                   |                   |         |       |
| Clashscore                                       | 10.70              |       |       | N.R.               | 12.81             | N.R.              | N.R.    |       |
| Poor rotamers(%)                                 | 0.00               |       |       | N.R.               | 0.00              | N.R.              | N.R.    |       |
| Cβ deviations (%)                                | 0.00               |       |       | N.R.               | 0.00              | N.R.              | N.R.    |       |
| Ramachandran plot                                |                    |       |       |                    |                   |                   |         |       |
| Favored (%)                                      | 93.23              |       |       | N.R.               | 98.15             | N.R.              | N.R.    |       |
| Allowed (%)                                      | 6.77               |       |       | N.R.               | 1.85              | N.R.              | N.R.    |       |
| Disallowed (%)                                   | 0.00               |       |       | N.R.               | 0.00              | N.R.              | N.R.    |       |
| PDB                                              | 7U10               |       |       |                    | 7U0Z              |                   |         |       |
| EMDB                                             | 26285              | 26286 | 26273 | 26284              | 26268             | 26283             | 26281   | 26282 |

**Table S4. Prediction of potential proteases responsible for TMEM106B cleavage at position 120 using the ProCleave server, Related to Figure 6 and STAR Methods.** Cleavage results with score above 0.5 at position TMEM106B(120) are listed below.

| Protease                                 | Position (score) | Position (score) | Position (score) |
|------------------------------------------|------------------|------------------|------------------|
| Granzyme A (S01.135)                     | 120 (0.73)       |                  |                  |
| Thrombin (S01.217)                       | 120 (0.85)       | 93 (0.71)        | 73 (0.64)        |
| Kallikrein-related peptidase 4 (S01.251) | 120 (0.73)       | 73 (0.68)        | 141 (0.68)       |
