# Supplementary material
Source: PubMed Central journal article supplement (PMC9018563)

Type A case 1 GRN

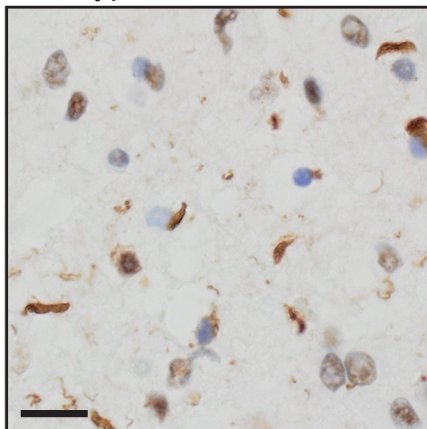

Type A case 2 GRN

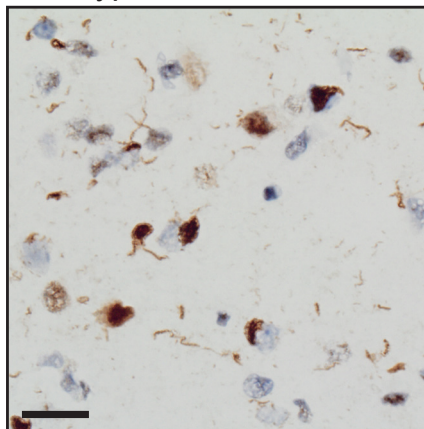

Type A case 3 GRN

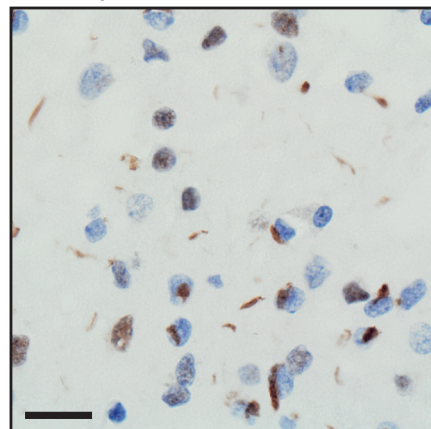

Type A case 4 sporadic

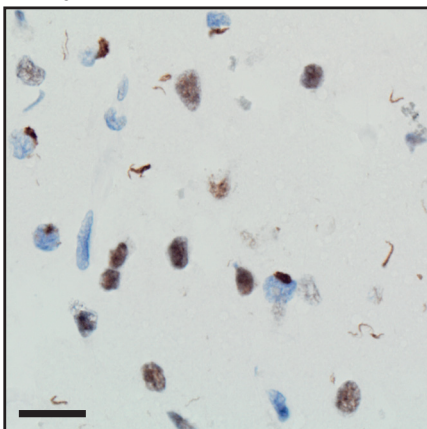

Type A case 5 GRN

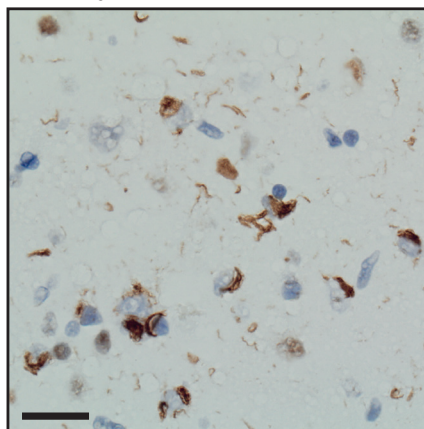

Type A case 6 GRN

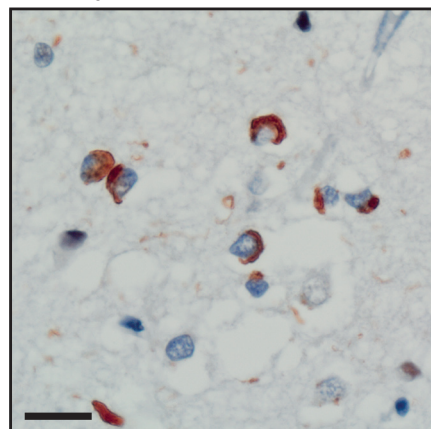

Type B case 1

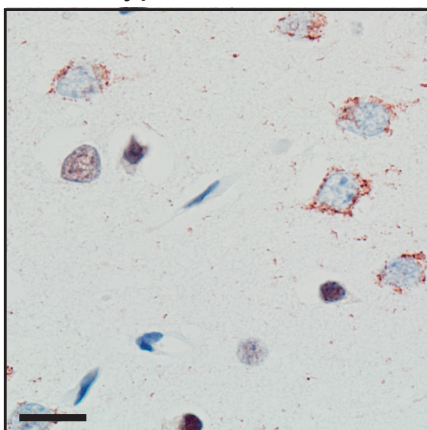

Type B case 2

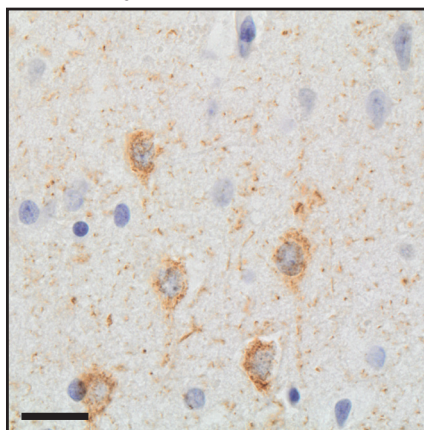

Type C

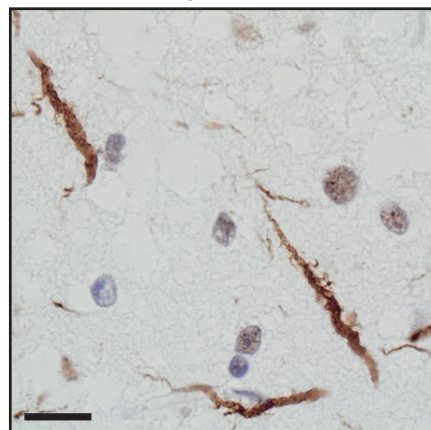

Supplement: NIHMS1784277-supplement-2.pdf [file NIHMS1784277-supplement-2.pdf]
