# Supplementary material
Source: PubMed Central journal article supplement (PMC9018563)

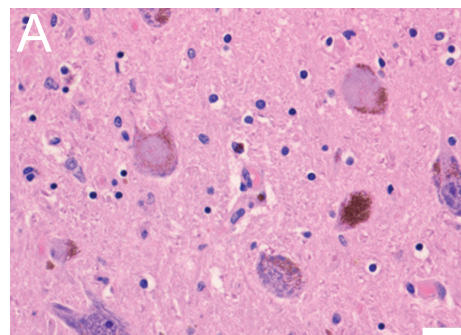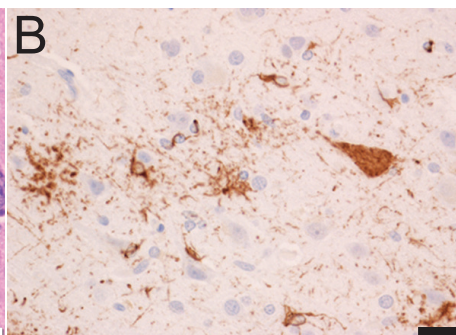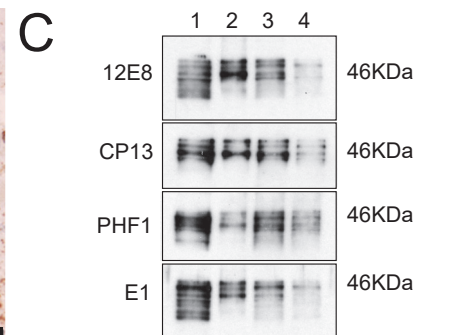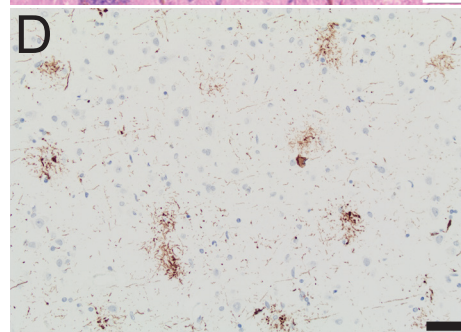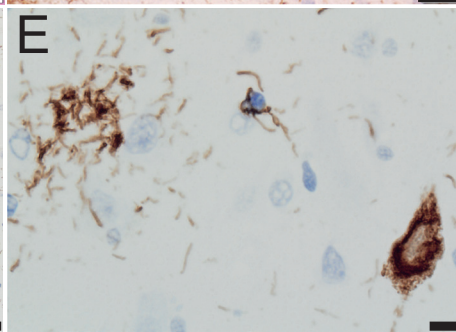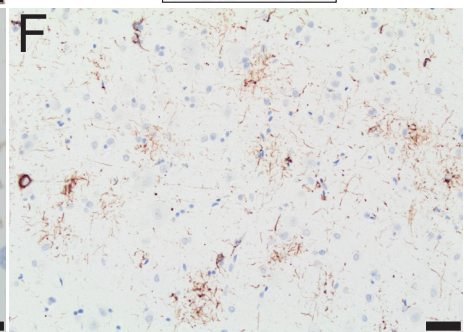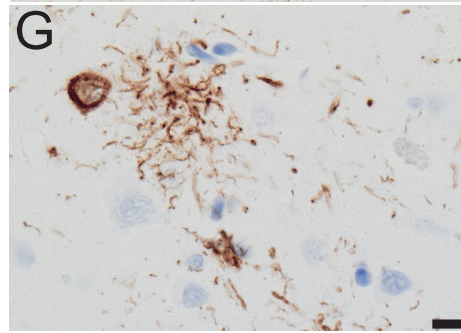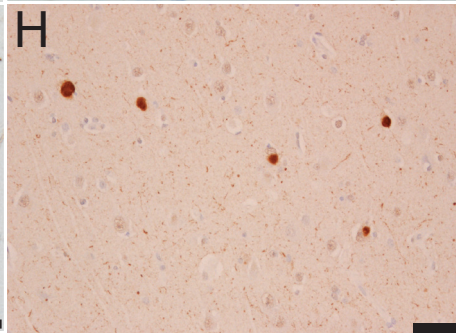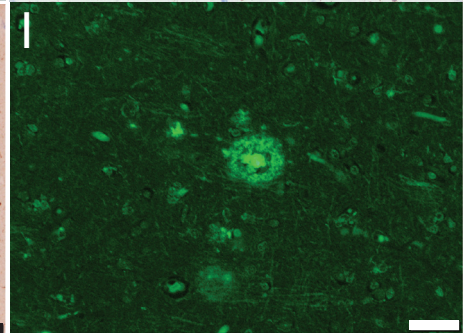

Supplement: NIHMS1784277-supplement-3.pdf [file NIHMS1784277-supplement-3.pdf]

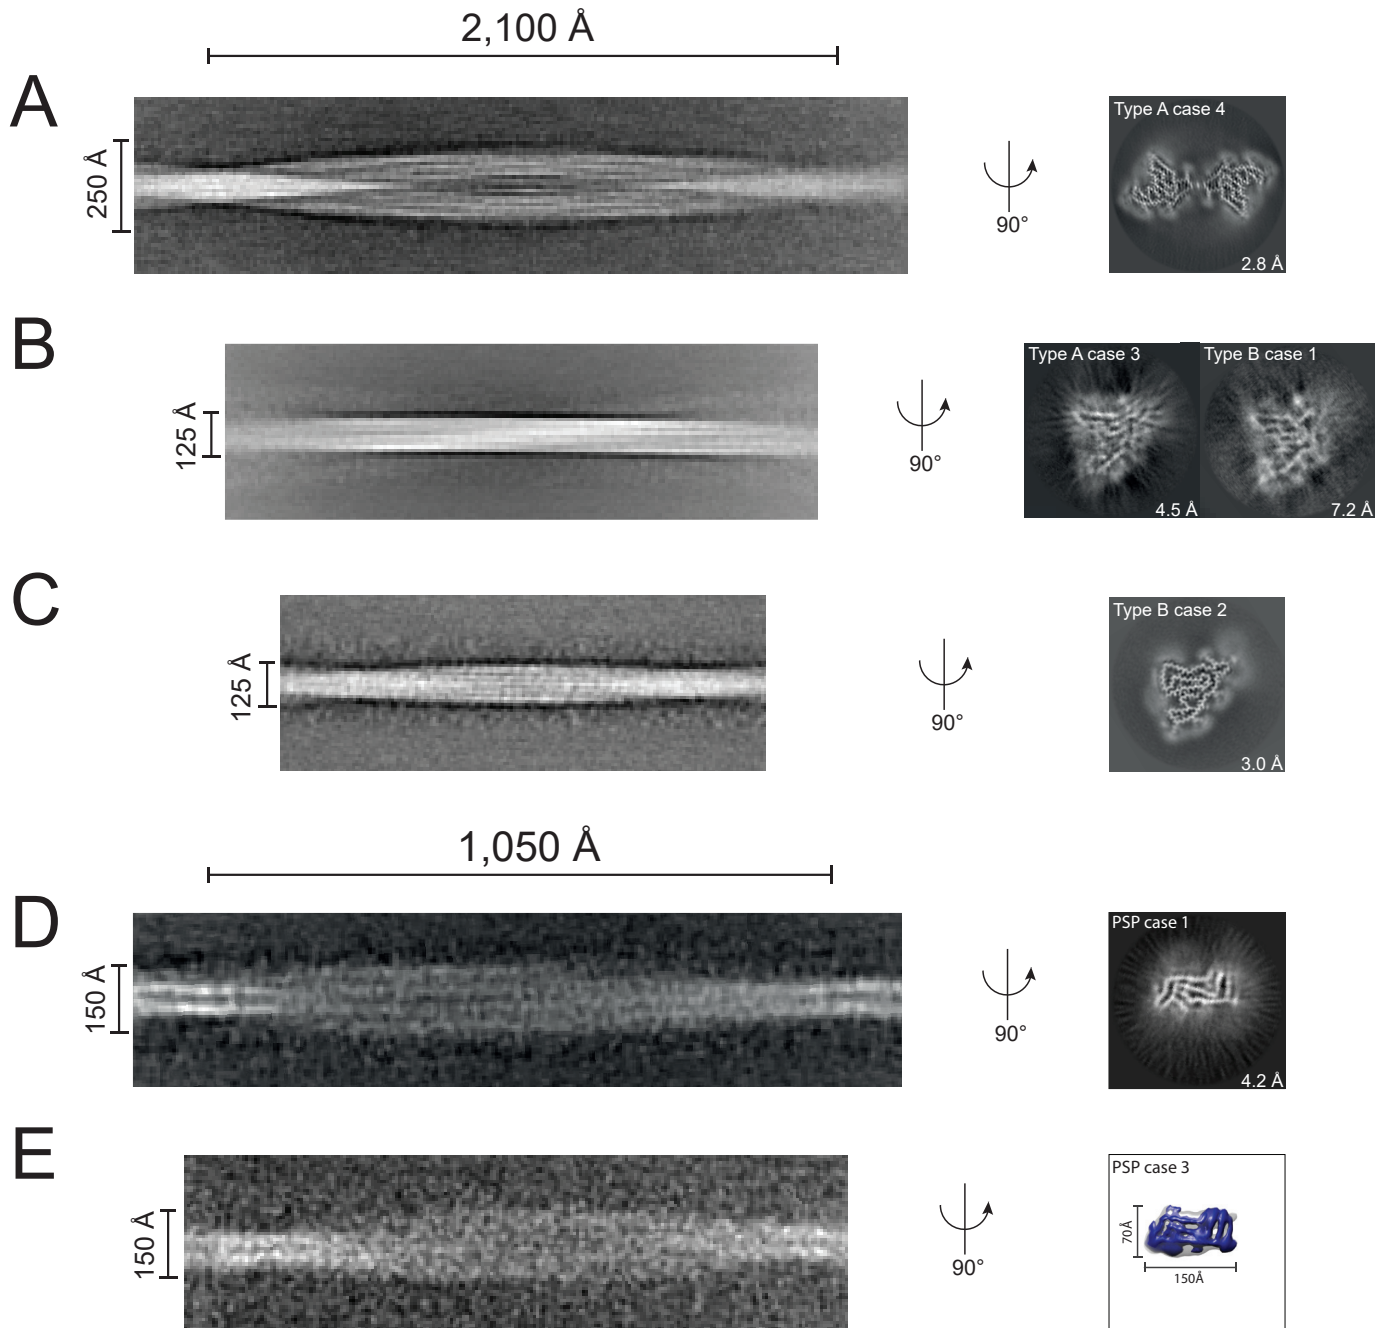

Supplement: NIHMS1784277-supplement-4.pdf [file NIHMS1784277-supplement-4.pdf]

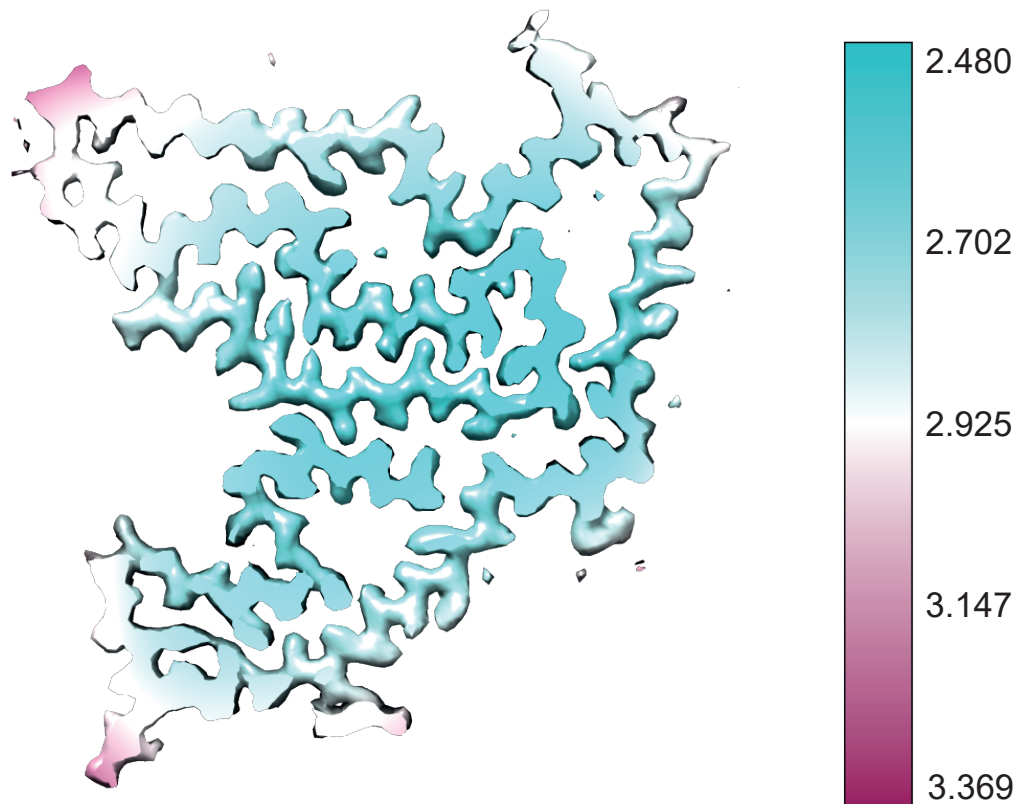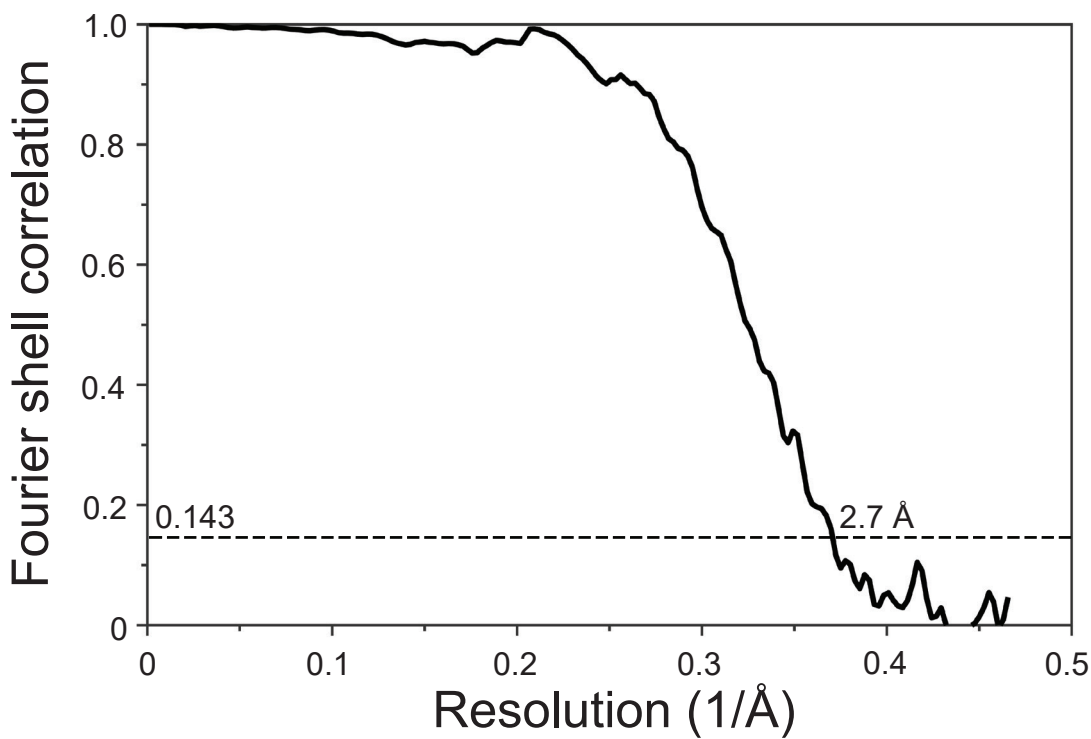

Supplement: NIHMS1784277-supplement-5.pdf [file NIHMS1784277-supplement-5.pdf]

A

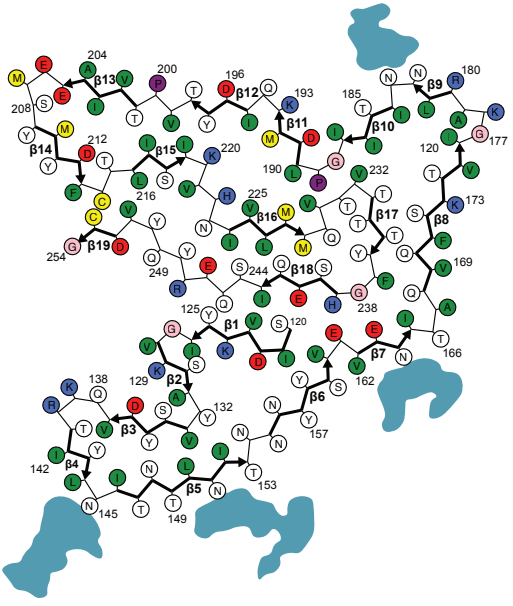

B

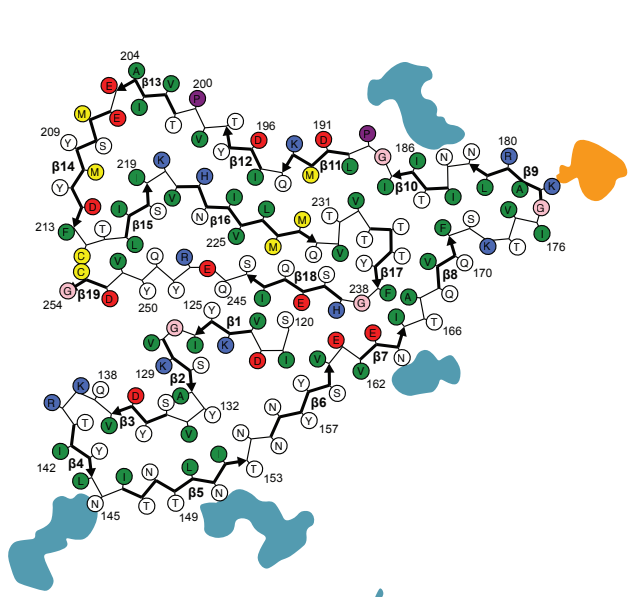

C

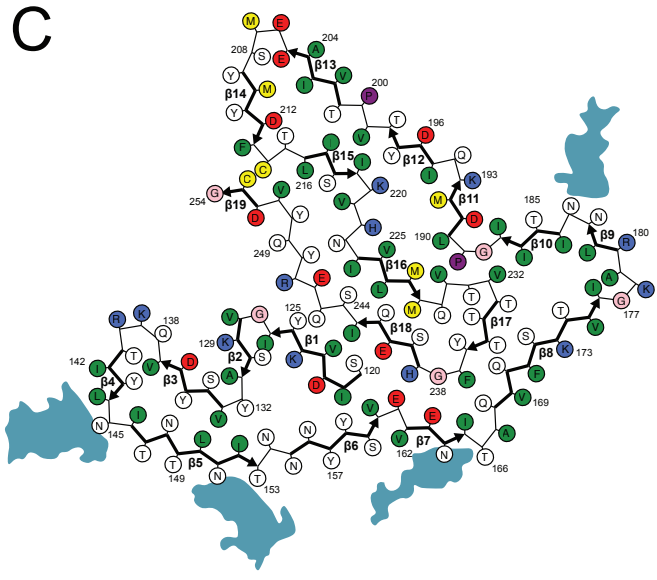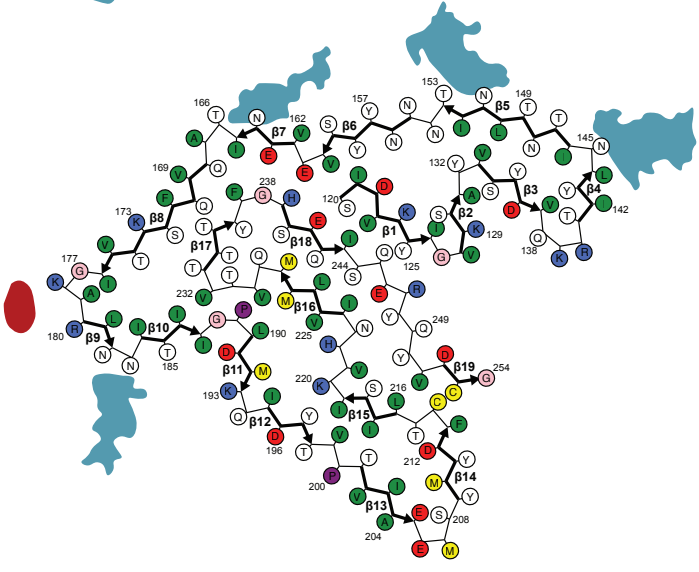

D

Cathespin P

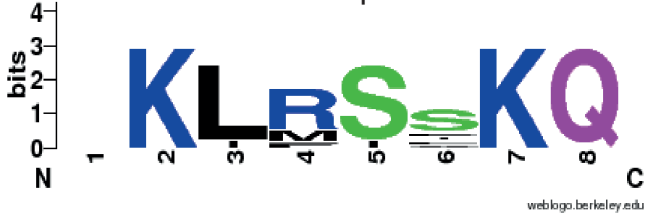

Granzyme A

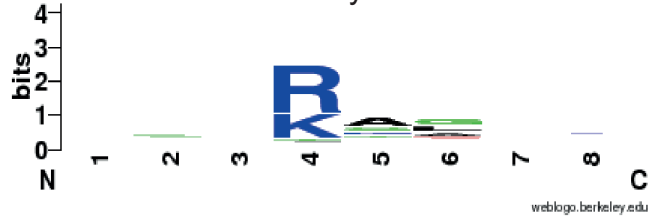

Kallikrein-related peptidase 4

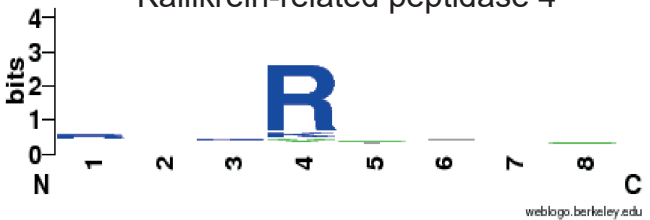

Thrombin

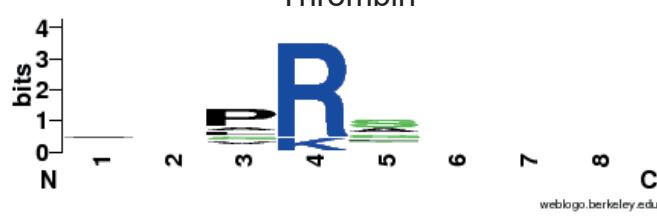

Supplement: NIHMS1784277-supplement-6.pdf [file NIHMS1784277-supplement-6.pdf]

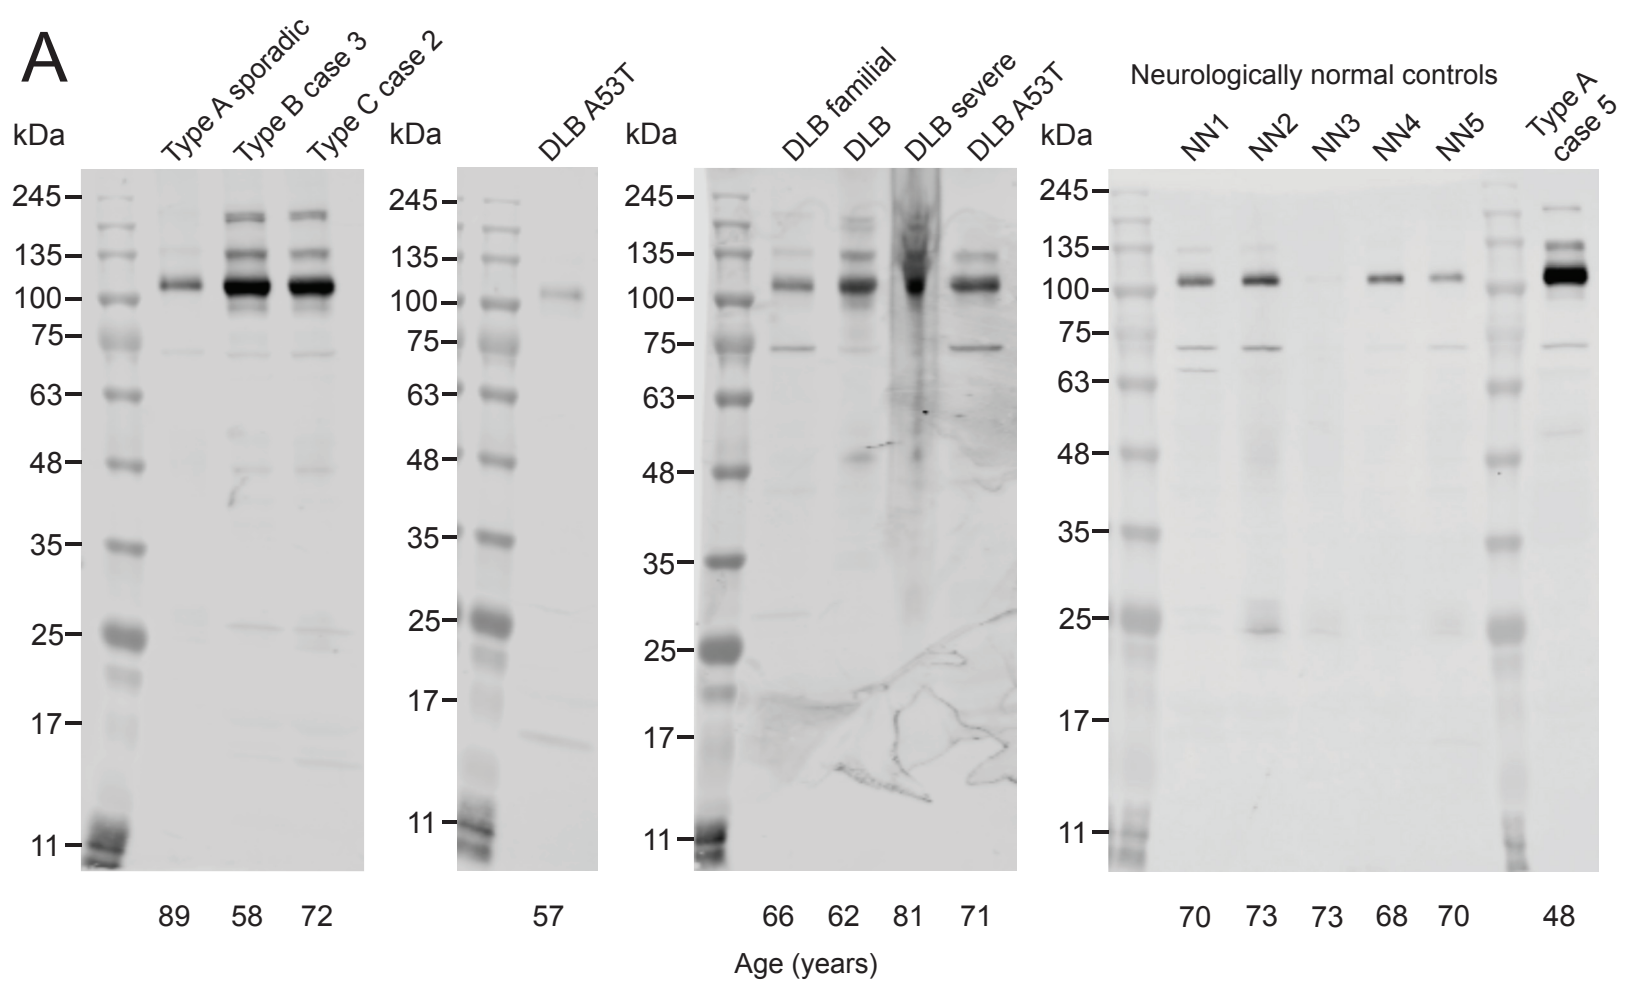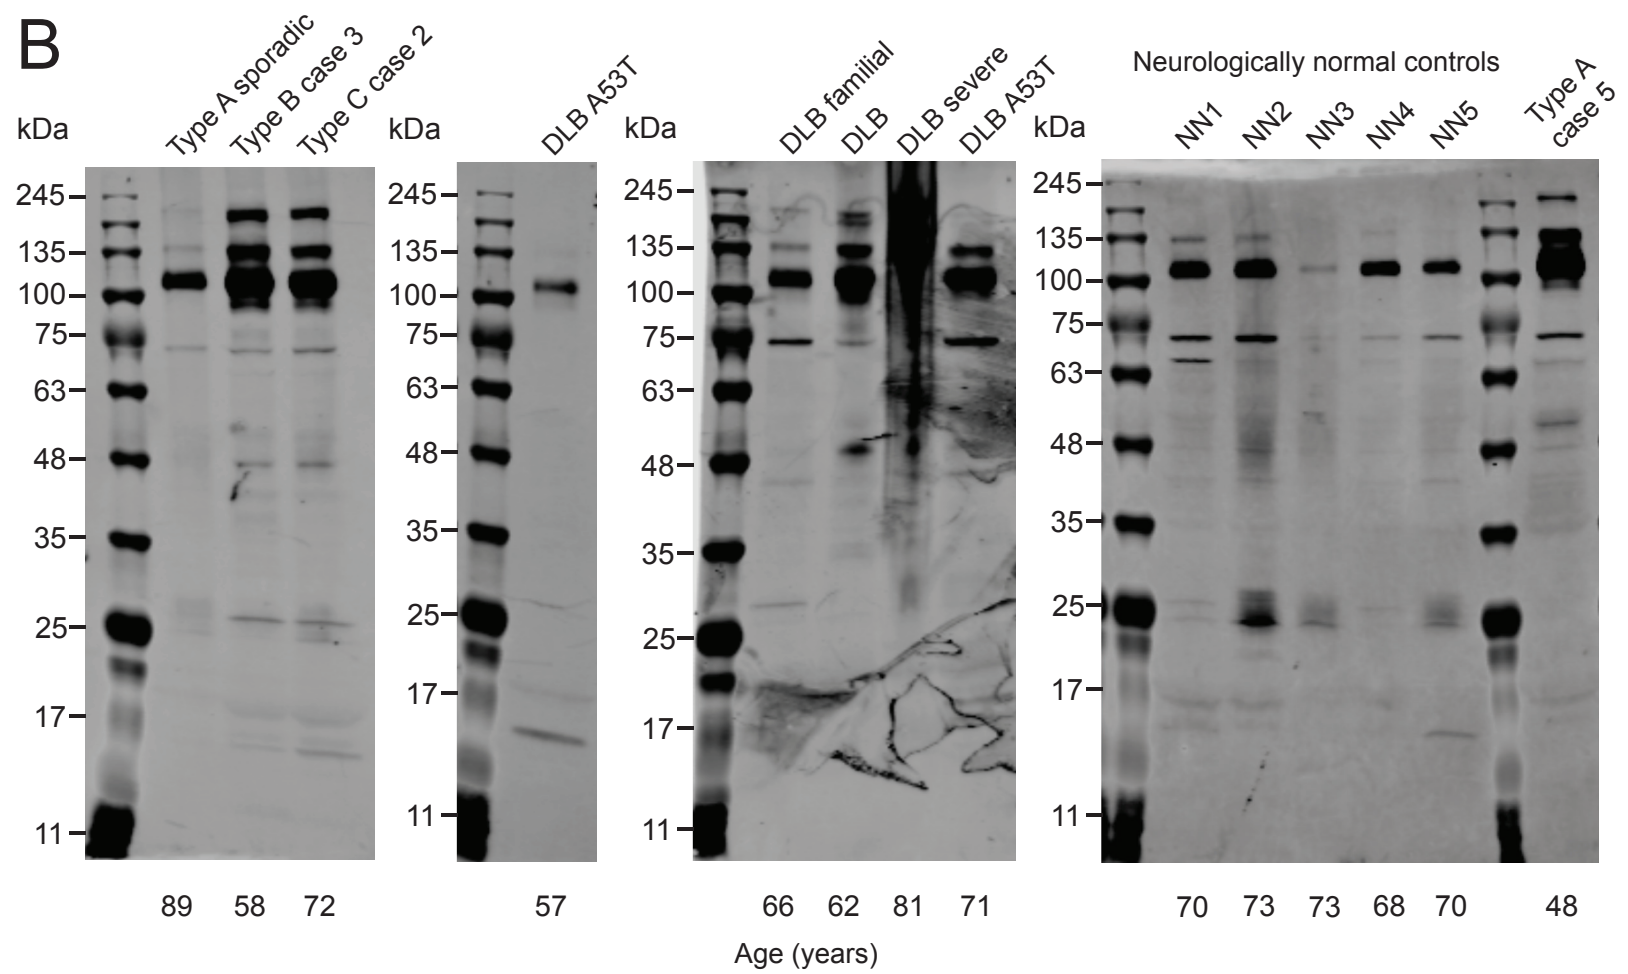

Supplement: NIHMS1784277-supplement-7.pdf [file NIHMS1784277-supplement-7.pdf]
